# Supplementary material
Source: HighWire-hosted journal article supplement (https://sti.bmj.com/content/96/6/457)
Supplement: inline-supplementary-material-1 [file inline-supplementary-material-1.pdf]

**Supplemental Table 1.** Correlates of high-grade and low-grade cervical lesions, adjusted for the presence of HPV infections.

|                                                  | ASCUS/LSIL<br>(N=51) |              |       | ASC-H/HSIL or SCC<br>(N=18) |               |      |
|--------------------------------------------------|----------------------|--------------|-------|-----------------------------|---------------|------|
|                                                  | aOR <sup>a</sup>     | (95% CI)     | p     | aOR <sup>a</sup>            | (95% CI)      | p    |
| Younger Age (<25 years)                          | 0.81                 | (0.40, 1.62) | 0.55  | 0.36                        | (0.10, 1.33)  | 0.13 |
| Less than Primary Education                      | 0.72                 | (0.32, 1.61) | 0.42  | 1.03                        | (0.31, 3.42)  | 0.97 |
| Unmarried                                        | 0.42                 | (0.05, 3.44) | 0.42  | 2.03                        | (0.37, 11.12) | 0.41 |
| Earn Income                                      | 1.23                 | (0.63, 2.42) | 0.55  | 0.83                        | (0.25, 2.75)  | 0.77 |
| HSV-2 Seropositive                               | 1.48                 | (0.75, 2.90) | 0.25  | 1.94                        | (0.60, 6.32)  | 0.27 |
| Early Age at First Sex (≤15 years )              | 0.69                 | (0.30, 1.61) | 0.39  | 2.11                        | (0.74, 6.05)  | 0.16 |
| Lifetime Sex Partners                            | 0.85                 | (0.72, 1.01) | 0.069 | 0.83                        | (0.61, 1.12)  | 0.22 |
| Lifetime STI                                     | 0.48                 | (0.22, 1.06) | 0.068 | 1.44                        | (0.51, 4.06)  | 0.49 |
| Parous                                           | 0.49                 | (0.16, 1.51) | 0.22  | 1.08                        | (0.12, 9.55)  | 0.95 |
| Unprotected Sex in Last Month <sup>b</sup>       | 0.90                 | (0.42, 1.89) | 0.77  | 1.33                        | (0.47, 3.79)  | 0.59 |
| More Frequent Sex in Last Month<br>(≥7 Sex Acts) | 0.74                 | (0.39, 1.43) | 0.37  | 0.37                        | (0.11, 1.19)  | 0.10 |
| Hormonal Contraceptive Use                       | 1.66                 | (0.79, 3.46) | 0.18  | 1.01                        | (0.26, 3.85)  | 0.99 |
| Practice dry sex                                 | 0.88                 | (0.47, 1.63) | 0.68  | 1.89                        | (0.66, 5.41)  | 0.24 |
| Vaginal Washing                                  | 1.56                 | (0.81, 3.00) | 0.18  | 1.35                        | (0.46, 3.95)  | 0.58 |
| Uncircumcised Partner                            | 0.96                 | (0.41, 2.26) | 0.93  | 0.69                        | (0.15, 3.31)  | 0.65 |
| Plasma HIV Viral Load <sup>c</sup>               | 0.99                 | (0.74, 1.33) | 0.96  | 1.04                        | (0.63, 1.70)  | 0.88 |
| CD4 Count <350 cells/μL                          | 1.61                 | (0.84, 3.07) | 0.15  | 1.94                        | (0.71, 5.35)  | 0.20 |

Abbreviations: HPV = human papillomavirus genotype; CI = confidence interval; HSV-2 = herpes simplex virus type-2; STI = sexually transmitted infection; HIV = human immunodeficiency virus

<sup>a</sup> aOR = adjusted OR comparing women with cervical lesions to those with normal cervical cytology, adjusted for low risk and high risk HPV infection.

<sup>b</sup> Reported by either member of the couple.

<sup>c</sup> HIV plasma viral load is in log<sub>10</sub> RNA copies/mL.
